# Supplementary material for: Diet-Related Behaviors and Diet Quality among School-Aged Adolescents Living in Greece
Source: PubMed Central journal article supplement (PMC7763124; doi:10.3390/nu12123804), 2020-12-11
Supplement: nutrients-12-03804-s001.pdf [file nutrients-12-03804-s001.pdf]

**Table S1.** Diet-related and lifestyle behaviors and characteristics by age group in the 2018 Greek arm of the Health Behaviour of School-Aged Children Study.

| Behaviors/Characteristics                                           | 11-Year Olds ( <i>n</i> = 1085) | 13-Year Olds ( <i>n</i> = 1220) | 15-Year Olds ( <i>n</i> = 1220) | <i>p</i> -Value* |
|---------------------------------------------------------------------|---------------------------------|---------------------------------|---------------------------------|------------------|
| Eating breakfast on weekdays, days/week, <i>n</i> (%)               |                                 |                                 |                                 | 0.098            |
| ≤1                                                                  | 354 (32.6)                      | 416 (34.1)                      | 390 (32.0)                      |                  |
| 2–3                                                                 | 137 (12.6)                      | 180 (14.8)                      | 199 (16.3)                      |                  |
| 4–5                                                                 | 594 (54.7)                      | 624 (51.1)                      | 631 (51.7)                      |                  |
| Eating with family, <i>n</i> (%)                                    |                                 |                                 |                                 | <0.001           |
| Rarely                                                              | 161 (14.8)                      | 267 (21.9)                      | 285 (23.4)                      |                  |
| Almost everyday                                                     | 924 (85.2)                      | 953 (78.1)                      | 935 (76.6)                      |                  |
| Eating snacks while watching TV, days/week, <i>n</i> (%)            |                                 |                                 |                                 | 0.017            |
| <1                                                                  | 341 (31.4)                      | 423 (34.7)                      | 450 (36.9)                      |                  |
| 1–2                                                                 | 284 (26.2)                      | 321 (26.3)                      | 343 (28.1)                      |                  |
| 3–4                                                                 | 201 (18.5)                      | 201 (16.5)                      | 196 (16.1)                      |                  |
| ≥5                                                                  | 259 (23.9)                      | 275 (22.5)                      | 231 (18.9)                      |                  |
| Eating snacks in front of PC/tablet/laptop, days/week, <i>n</i> (%) |                                 |                                 |                                 | <0.001           |
| <1                                                                  | 391 (36.0)                      | 408 (33.4)                      | 420 (34.4)                      |                  |
| 1–2                                                                 | 231 (21.3)                      | 208 (17.0)                      | 222 (18.2)                      |                  |
| 3–4                                                                 | 172 (15.9)                      | 163 (13.4)                      | 192 (15.7)                      |                  |
| ≥5                                                                  | 291 (26.8)                      | 441 (36.1)                      | 386 (31.6)                      |                  |
| Eating meals while watching TV, days/week, <i>n</i> (%)             |                                 |                                 |                                 | 0.002            |
| <1                                                                  | 393 (36.2)                      | 436 (35.7)                      | 459 (37.6)                      |                  |
| 1–2                                                                 | 268 (24.7)                      | 265 (21.7)                      | 221 (18.1)                      |                  |
| 3–4                                                                 | 177 (16.3)                      | 197 (16.1)                      | 189 (15.5)                      |                  |
| ≥5                                                                  | 247 (22.8)                      | 322 (26.4)                      | 351 (28.8)                      |                  |
| Eating in fast-food restaurants, <i>n</i> (%)                       |                                 |                                 |                                 | <0.001           |
| Rarely                                                              | 475 (43.8)                      | 374 (30.7)                      | 322 (26.4)                      |                  |
| 1–3 days per month                                                  | 458 (42.2)                      | 545 (44.7)                      | 502 (41.1)                      |                  |
| Once per week                                                       | 114 (10.5)                      | 226 (18.5)                      | 277 (22.7)                      |                  |
| At least twice per week                                             | 38 (3.5)                        | 75 (6.1)                        | 119 (9.8)                       |                  |
| Family affluence scale (FAS) score <sup>a</sup> , <i>n</i> (%)      |                                 |                                 |                                 | 0.032            |
| Least affluent 20%                                                  | 154 (14.2)                      | 182 (14.9)                      | 168 (13.8)                      |                  |
| Middle affluent 60%                                                 | 677 (62.4)                      | 759 (62.2)                      | 822 (67.4)                      |                  |
| Highest affluent 20%                                                | 254 (23.4)                      | 279 (22.9)                      | 230 (18.9)                      |                  |
| Physical activity in the past 7 days, days, mean (sd)               | 4.4 (1.9)                       | 4.0 (2.0)                       | 3.7 (2.1)                       | <0.001           |

Abbreviation: sd; standard deviation. <sup>a</sup> Quantiles calculated based on FAS score distribution of FAS score by gender and age group. \* *p*-values from Pearson's X<sup>2</sup>-test for categorical variables and one-way ANOVA for continuous variables.

**Table S2.** Frequency of consumption of specific food items, mean diet quality score and categories of diet quality score by age group in the 2018 Greek arm of the Health Behaviour of School-Aged Children Study.

| Food Items/Diet Quality Score                      | 11-Year Olds (n = 1085) | 13-Year Olds (n = 1220) | 15-Year Olds (n = 1220) | p-Value <sup>†</sup> |
|----------------------------------------------------|-------------------------|-------------------------|-------------------------|----------------------|
| Fruits intake, days/week, n (%)                    |                         |                         |                         | <0.001               |
| ≤1                                                 | 156 (14.4)              | 244 (20.0)              | 290 (23.8)              |                      |
| 2–4                                                | 318 (29.3)              | 422 (34.6)              | 446 (36.6)              |                      |
| 5–6                                                | 188 (17.3)              | 187 (15.3)              | 191 (15.7)              |                      |
| 7                                                  | 251 (23.1)              | 255 (20.9)              | 173 (14.2)              |                      |
| >once daily                                        | 172 (15.9)              | 112 (9.2)               | 120 (9.8)               |                      |
| Vegetables intake, days/week, n (%)                |                         |                         |                         | <0.001               |
| ≤1                                                 | 228 (21.0)              | 220 (18.0)              | 231 (18.9)              |                      |
| 2–4                                                | 247 (22.8)              | 318 (26.1)              | 348 (28.5)              |                      |
| 5–6                                                | 201 (18.5)              | 261 (21.4)              | 281 (23.0)              |                      |
| 7                                                  | 282 (26.0)              | 293 (24.0)              | 238 (19.5)              |                      |
| >once daily                                        | 127 (11.7)              | 128 (10.5)              | 122 (10.0)              |                      |
| Sweets intake, days/week, n (%)                    |                         |                         |                         | <0.001               |
| ≤1                                                 | 523 (48.2)              | 439 (36.0)              | 388 (31.8)              |                      |
| 2–4                                                | 331 (30.5)              | 401 (32.9)              | 446 (36.6)              |                      |
| 5–6                                                | 102 (9.4)               | 172 (14.1)              | 181 (14.8)              |                      |
| 7                                                  | 81 (7.5)                | 119 (9.8)               | 119 (9.8)               |                      |
| >once daily                                        | 48 (4.4)                | 89 (7.3)                | 86 (7.0)                |                      |
| Sugar-sweetened beverages intake, days/week, n (%) |                         |                         |                         | <0.001               |
| ≤1                                                 | 864 (79.6)              | 810 (66.4)              | 803 (65.8)              |                      |
| 2–4                                                | 136 (12.5)              | 266 (21.8)              | 277 (22.7)              |                      |
| 5–6                                                | 39 (3.6)                | 60 (4.9)                | 69 (5.7)                |                      |
| 7                                                  | 25 (2.3)                | 51 (4.2)                | 35 (2.9)                |                      |
| >once daily                                        | 21 (1.9)                | 33 (2.7)                | 36 (3.0)                |                      |
| Diet quality score <sup>a</sup> , mean (sd)        | 10.6 (2.7)              | 9.7 (2.8)               | 9.4 (2.9)               | <0.001               |
| Diet quality groups <sup>b</sup>                   |                         |                         |                         | <0.001               |
| Poor                                               | 360 (33.2)              | 523 (42.9)              | 621 (50.9)              |                      |
| Moderate                                           | 456 (42.0)              | 514 (42.1)              | 419 (34.3)              |                      |
| Good                                               | 269 (24.8)              | 183 (15.0)              | 180 (14.8)              |                      |

Abbreviation: sd; standard deviation. <sup>a</sup> Values range from 0 to 16. Zero corresponds to the worst possible diet (once a week or less often fruits and vegetables/salads and more than once daily sweets and sugar-sweetened beverages) and 16 to the best possible diet (once a week or less often sweets and sugar-sweetened beverages and more than once daily fruits and vegetables/salads). <sup>b</sup> Calculated using dietary score's tertiles. Poor includes dietary scores from 0 to 9, moderate includes scores from 10 to 12 and good includes scores from 13 to 16. <sup>†</sup> p-values from Pearson's  $\chi^2$ -test for categorical variables and one-way ANOVA for continuous variables.

**Table S3.** Adjusted odds ratios (OR) and associated 95% confidence intervals (CI) from multivariable ordinal logistic regression model for the association between diet-related behaviors and other characteristics and diet quality score<sup>†</sup> by gender in the 2018 Greek arm of the Health Behaviour of School-Aged Children Study.

| Behaviors/Characteristics                             | Diet Quality Score <sup>†</sup> |         |                   |         |
|-------------------------------------------------------|---------------------------------|---------|-------------------|---------|
|                                                       | Boys (n = 1708)                 |         | Girls (n = 1817)  |         |
|                                                       | OR (95% CI)                     | p-Value | OR (95% CI)       | p-Value |
| Age group                                             |                                 |         |                   |         |
| 11-year olds                                          | Ref.                            |         | Ref.              |         |
| 13-year olds                                          | 1.38 (1.07–1.78)                | 0.014   | 1.24 (0.99–1.55)  | 0.066   |
| 15-year olds                                          | 1.63 (1.25–2.11)                | <0.001  | 1.43 (1.12–1.82)  | 0.004   |
| Place of birth                                        |                                 |         |                   |         |
| Greece                                                | Ref.                            |         | Ref.              |         |
| Other                                                 | 1.00 (0.59–1.70)                | 0.990   | 1.68 (0.97–2.91)  | 0.067   |
| Physical activity in the past 7 days, days            | 0.79 (0.76–0.84)                | <0.001  | 0.80 (0.76–0.84)  | <0.001  |
| Eating breakfast on weekdays, days/week               |                                 |         |                   |         |
| ≤1                                                    | 1.26 (1.02–1.57)                | 0.035   | 1.89 (1.52–2.33)  | <0.001  |
| 2–3                                                   | 0.96 (0.72–1.27)                | 0.751   | 1.40 (1.09–1.79)  | 0.007   |
| 4–5                                                   | Ref.                            |         | Ref.              |         |
| Eating with family                                    |                                 |         |                   |         |
| Rarely                                                | 1.22 (0.97–1.53)                | 0.093   | 1.46 (1.14–1.87)  | 0.003   |
| Almost everyday                                       | Ref.                            |         | Ref.              |         |
| Eating snacks while watching TV, days/week            |                                 |         |                   |         |
| <1                                                    | Ref.                            |         | Ref.              |         |
| 1–2                                                   | 1.09 (0.84–1.41)                | 0.517   | 1.39 (1.09–1.78)  | 0.008   |
| 3–4                                                   | 1.29 (0.97–1.71)                | 0.080   | 1.62 (1.20–2.20)  | 0.002   |
| ≥5                                                    | 1.32 (0.97–1.81)                | 0.079   | 1.52 (1.12–2.05)  | 0.007   |
| Eating snacks in front of PC/laptop/tablet, days/week |                                 |         |                   |         |
| <1                                                    | Ref.                            |         | Ref.              |         |
| 1–2                                                   | 1.26 (0.95–1.68)                | 0.104   | 1.06 (0.83–1.35)  | 0.650   |
| 3–4                                                   | 1.69 (1.25–2.28)                | 0.001   | 1.33 (0.97–1.83)  | 0.074   |
| ≥5                                                    | 2.19 (1.71–2.79)                | <0.001  | 1.61 (1.22–2.13)  | 0.001   |
| Eating meals while watching TV, days/week             |                                 |         |                   |         |
| <1                                                    | Ref.                            |         | Ref.              |         |
| 1–2                                                   | 1.28 (1.00–1.64)                | 0.054   | 1.03 (0.81–1.30)  | 0.817   |
| 3–4                                                   | 1.48 (1.11–1.95)                | 0.007   | 1.50 (1.13–1.98)  | 0.005   |
| ≥5                                                    | 1.53 (1.18–1.97)                | 0.001   | 1.41 (1.07–1.85)  | 0.014   |
| Eating in fast-food restaurants                       |                                 |         |                   |         |
| Rarely                                                | Ref.                            |         | Ref.              |         |
| 1–3 days per month                                    | 1.48 (1.19–1.86)                | 0.001   | 1.56 (1.26–1.92)  | <0.001  |
| Once per week                                         | 2.15 (1.6–2.88)                 | <0.001  | 2.20 (1.62–2.97)  | <0.001  |
| At least twice per week                               | 3.41 (2.15–5.41)                | <0.001  | 8.12 (4.34–15.18) | <0.001  |
| Family affluence scale (FAS) score <sup>a</sup>       |                                 |         |                   |         |

|                        |                  |       |                  |       |
|------------------------|------------------|-------|------------------|-------|
| Least (20%) affluent   | Ref.             |       | Ref.             |       |
| Middle (60%) affluent  | 0.93 (0.71–1.22) | 0.584 | 0.75 (0.58–0.98) | 0.034 |
| Highest (20%) affluent | 0.65 (0.47–0.89) | 0.007 | 0.66 (0.48–0.89) | 0.006 |

Abbreviation: Ref.; Reference. <sup>a</sup> Quantiles calculated based on FAS score distribution of FAS score by gender and age group. <sup>†</sup> Diet quality is the outcome variable which is divided into three categories: good, moderate and poor. These categories are dietary score's quantiles calculated as follows; poor: dietary scores from 0 to 9, moderate: dietary scores from 10 to 12, good: dietary scores from 13 to 16. The good diet quality category is the reference category in order to identify behaviors associated with increased odds of not having a good diet quality score.

**Table S4.** Adjusted odds ratios (OR) and associated 95% confidence intervals (CI) from multivariable ordinal logistic regression model further adjusted for body mass index for the association between diet-related behaviors and other characteristics and diet quality score<sup>†</sup> among 3386 participants in the 2018 Greek arm of the Health Behaviour of School-Aged Children Study.

| Behaviors/Characteristics                             | Diet Quality score <sup>†</sup> |                 |
|-------------------------------------------------------|---------------------------------|-----------------|
|                                                       | OR (95% CI)                     | <i>p</i> -Value |
| Gender                                                |                                 |                 |
| Boys                                                  | 1.36 (1.19–1.55)                | <0.001          |
| Girls                                                 | Ref.                            |                 |
| Age group                                             |                                 |                 |
| 11-year olds                                          | Ref.                            |                 |
| 13-year olds                                          | 1.32 (1.10–1.59)                | 0.003           |
| 15-year olds                                          | 1.64 (1.35–2.00)                | <0.001          |
| Place of birth                                        |                                 |                 |
| Greece                                                | Ref.                            |                 |
| Other                                                 | 1.20 (0.82–1.76)                | 0.355           |
| Body mass index, kg/m <sup>2</sup>                    | 0.97 (0.95–0.99)                | 0.011           |
| Physical activity in the past 7 days, days            | 0.79 (0.76–0.82)                | <0.001          |
| Eating breakfast on weekdays, days/week               |                                 |                 |
| ≤1                                                    | 1.62 (1.39–1.89)                | <0.001          |
| 2–3                                                   | 1.25 (1.03–1.52)                | 0.024           |
| 4–5                                                   | Ref.                            |                 |
| Eating with family                                    |                                 |                 |
| Rarely                                                | 1.35 (1.13–1.62)                | 0.001           |
| Almost everyday                                       | Ref.                            |                 |
| Eating snacks while watching TV, days/week            |                                 |                 |
| <1                                                    | Ref.                            |                 |
| 1–2                                                   | 1.25 (1.04–1.50)                | 0.019           |
| 3–4                                                   | 1.52 (1.23–1.87)                | <0.001          |
| ≥5                                                    | 1.39 (1.12–1.72)                | 0.003           |
| Eating snacks in front of PC/laptop/tablet, days/week |                                 |                 |
| <1                                                    | Ref.                            |                 |
| 1–2                                                   | 1.15 (0.96–1.39)                | 0.131           |
| 3–4                                                   | 1.51 (1.21–1.88)                | <0.001          |
| ≥5                                                    | 1.92 (1.59–2.31)                | <0.001          |
| Eating meals while watching TV, days/week             |                                 |                 |
| <1                                                    | Ref.                            |                 |
| 1–2                                                   | 1.16 (0.97–1.38)                | 0.096           |
| 3–4                                                   | 1.47 (1.20–1.81)                | <0.001          |
| ≥5                                                    | 1.50 (1.24–1.81)                | <0.001          |
| Visiting fast-food restaurants                        |                                 |                 |
| Rarely                                                | Ref.                            |                 |
| 1–3 days per month                                    | 1.53 (1.30–1.80)                | <0.001          |

|                                           |                  |        |
|-------------------------------------------|------------------|--------|
| Once per week                             | 2.22 (1.78–2.78) | <0.001 |
| At least twice per week                   | 4.28 (2.89–6.34) | <0.001 |
| Family affluence (FAS) score <sup>a</sup> |                  |        |
| Least affluent 20%                        | Ref.             |        |
| Middle affluent 60%                       | 0.86 (0.72–1.04) | 0.123  |
| Highest affluent 20%                      | 0.68 (0.55–0.84) | <0.001 |

---

Abbreviation: Ref.; Reference. <sup>a</sup> Quantiles calculated based on gender and age group. <sup>†</sup> Diet quality is the outcome variable which is divided into three categories: good, moderate and poor. These categories are dietary score's quantiles calculated as follows; poor: dietary scores from 0 to 9, moderate: dietary scores from 10 to 12, good: dietary scores from 13 to 16. The good diet quality category is the reference category in order to identify behaviors associated with increased odds of not having a good diet quality score.
